# Supplementary material
Source: publisher figshare collection journal article supplement (https://acs.figshare.com/ndownloader/files/4166287)
Supplement: Supplementary file 1 [file 4166287]

## Supplementary material

Water density visualization: The water density figures were plotted using the density option of volmap plugin of vmd, in which the water number density (red to blue: low to high) was computed by additively distributing normalized Gaussians of width equal to atomic radius of mW particle (i.e. oxygen atom) on a 2 Å grid. Then, the generated volumetric maps were visualized using the volumeslice display method, in which a two-dimensional slice of the volumetric data in the plane of the polymer was shown.

**Table S1: Density of mW water at (T, P) studied**

| T(K) | P(atm) | Density(kg/m <sup>3</sup> ) |
|------|--------|-----------------------------|
| 250  | 1      | 1002                        |
| 400  | 1      | 960                         |
| 400  | 2500   | 1000                        |
| 400  | 10000  | 1080                        |
| 800  | 1      | 710                         |

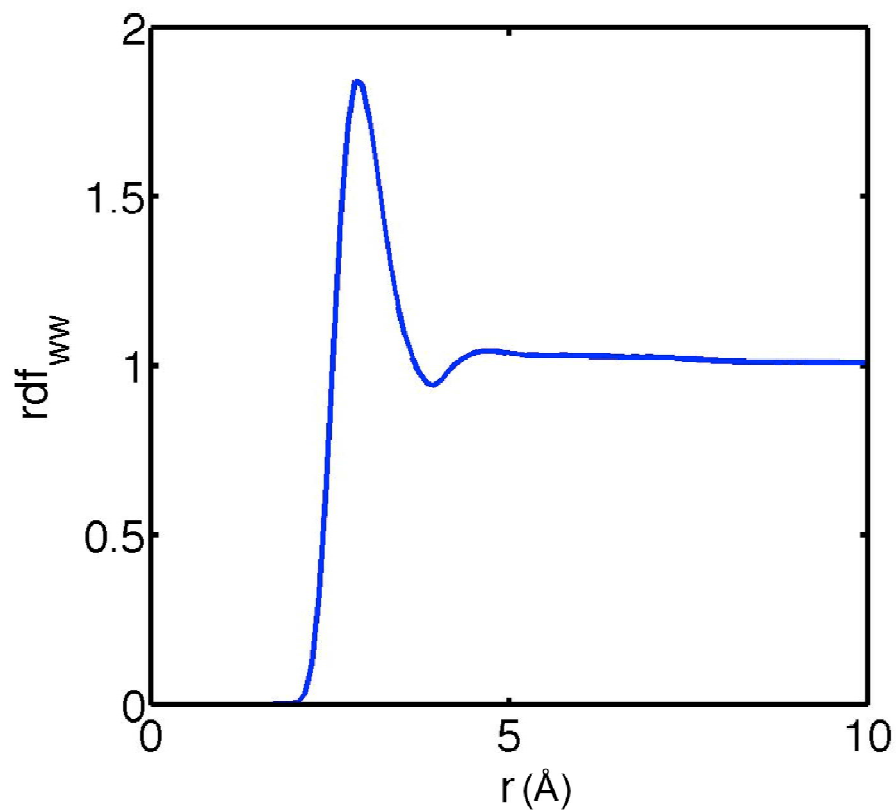

**Figure S1:** Water-water radial distribution function for T=800K and P=1atm

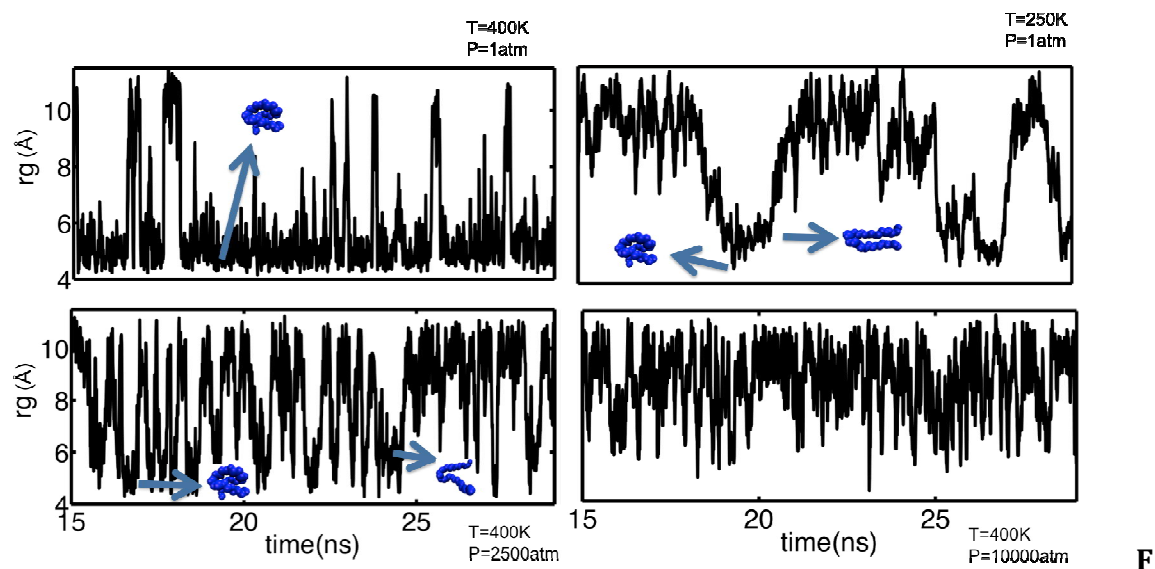

**figure S2:** Radius of gyration of the polymer as a function of time at different pressures and temperatures. Only a portion of the trajectory is shown. Typical representations populated with different  $rg$  values are shown.

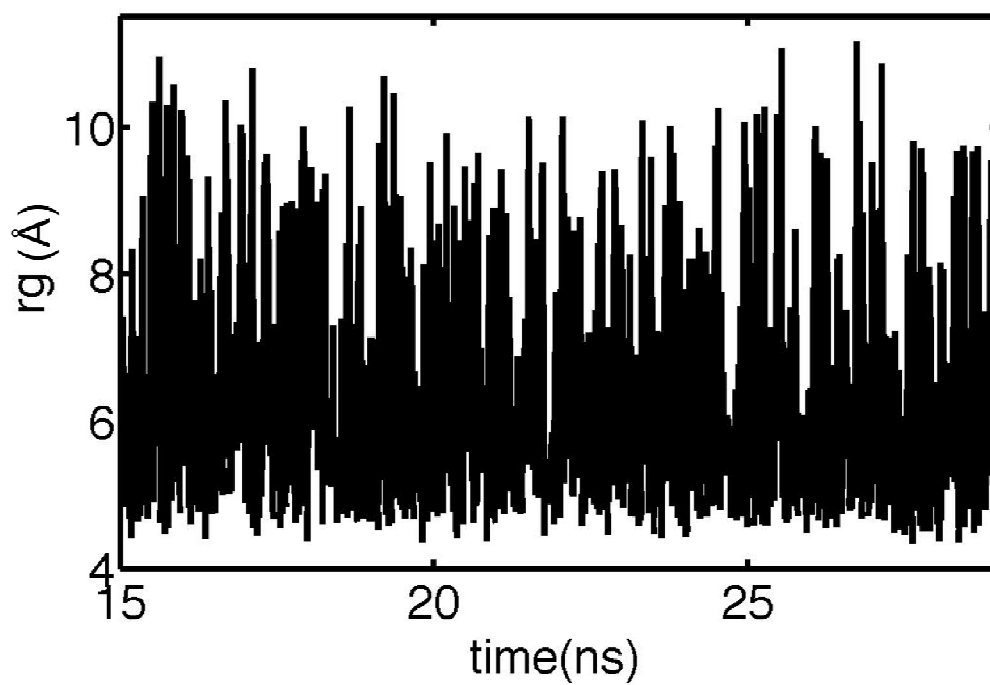

**Figure S3:** Radius of gyration of the polymer as a function of time at 800 K and 1 atm. Only a portion of the trajectory is shown.



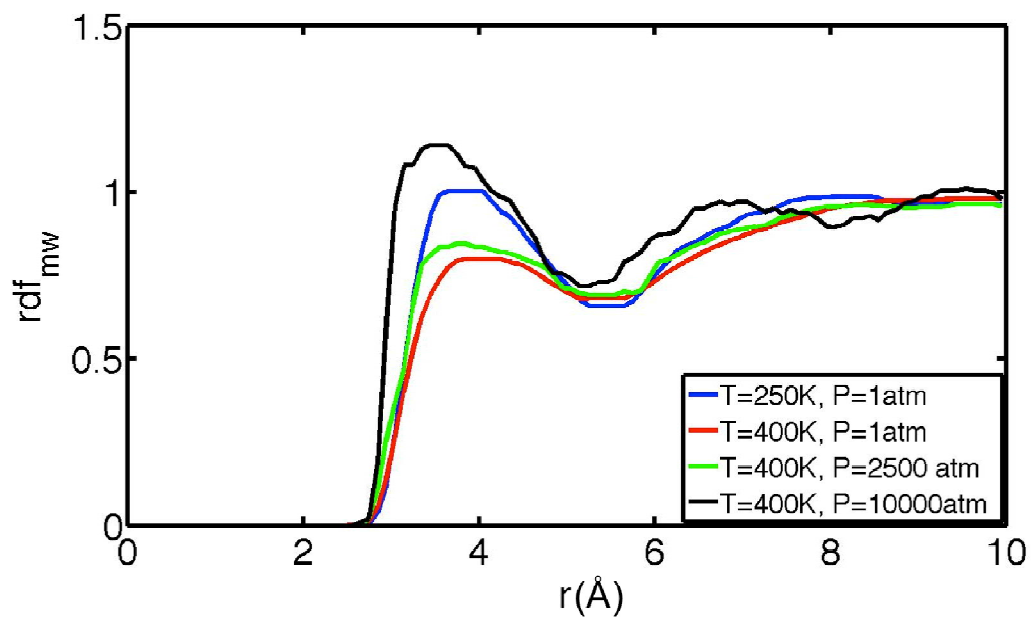

**Figure S4:** Monomer-water radial distribution function using only folded polymer conformations for a range of temperatures and pressures.

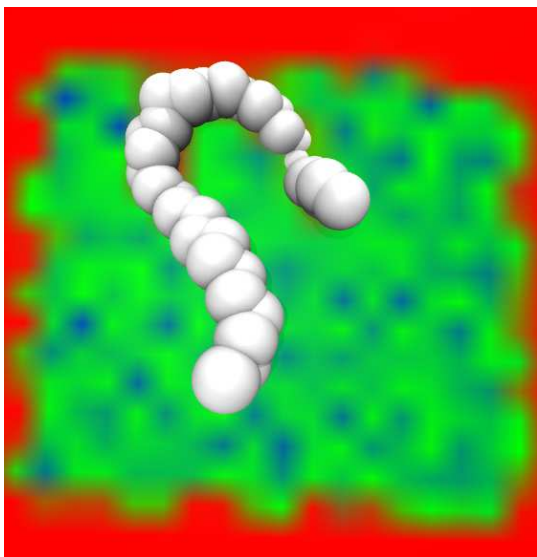

**Figure S5:** Water density map (red to blue: low to high) in the hydration shell for a typical hairpin conformation at  $T = 400$  K and  $P = 10000$  atm.

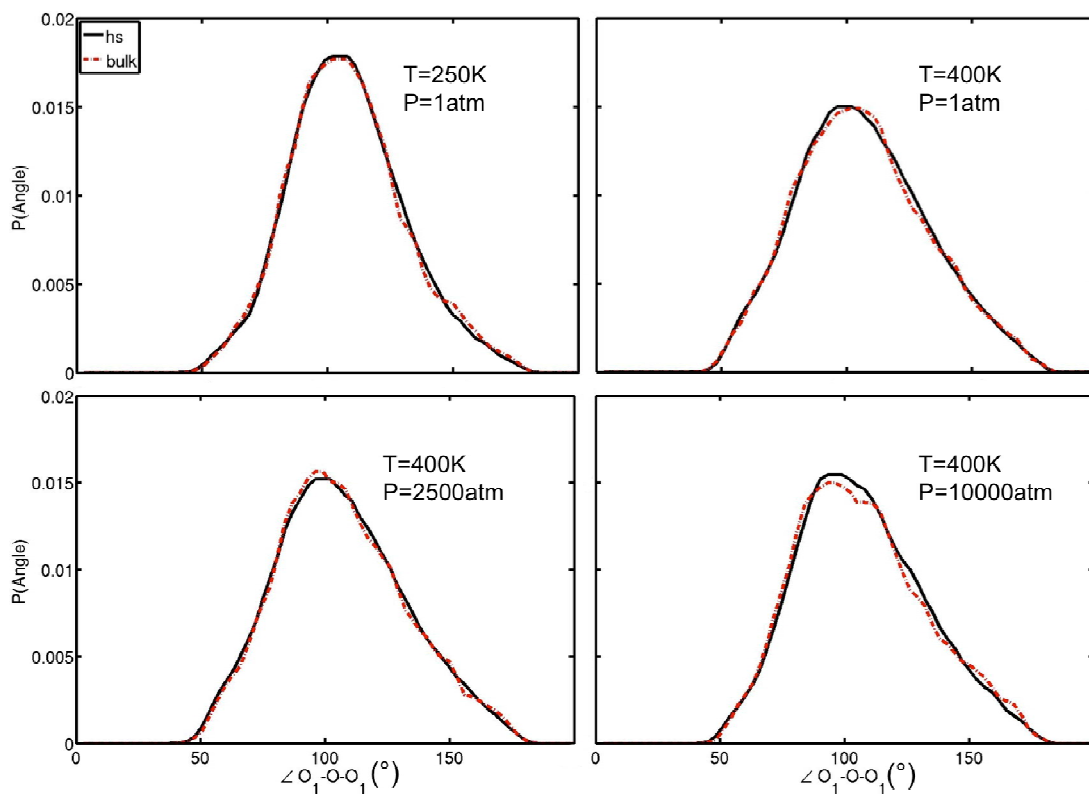

**Figure S6:** Angular distribution ( $\angle O_1-O-O_1$ ) between the first nearest neighbor's water molecules at different temperatures and pressures. First neighbors are considered to be the 1st-4th closest neighbors. The angular distribution exhibits a single broad peak centered on the typical tetrahedral angle and high pressures and low temperatures marginally affect it.

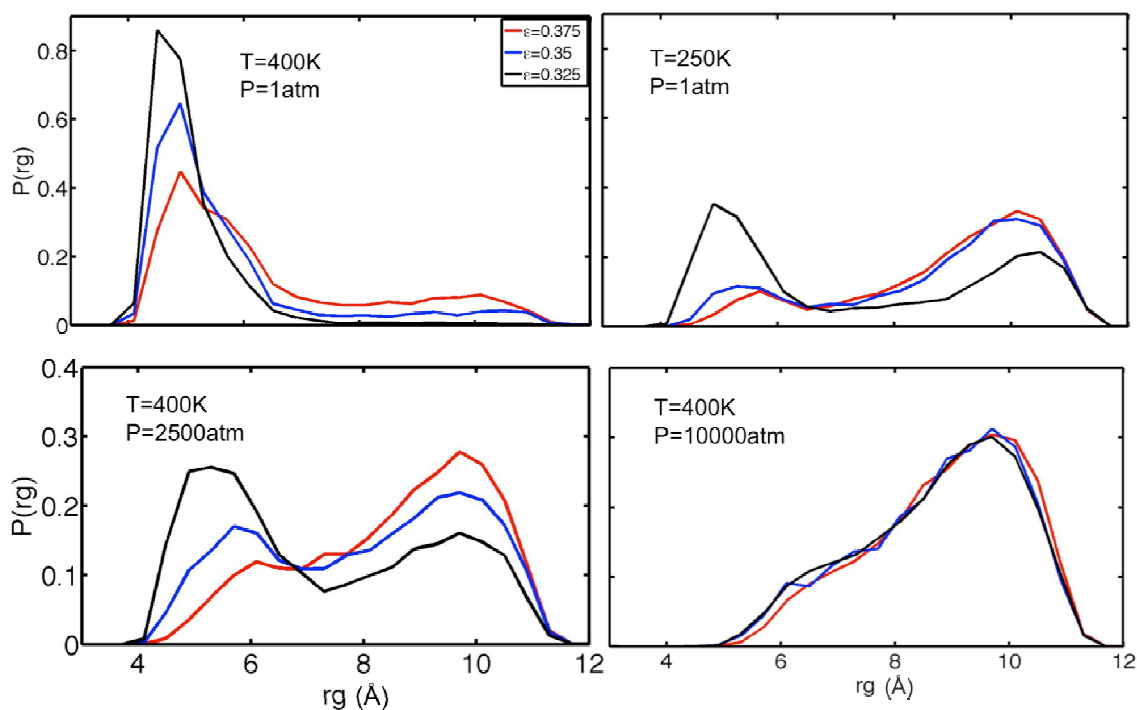

**Figure S7:** Normalized distributions of the radius of gyration ( $rg$ ) of the hydrophobic polymer. The plots are displayed for different values of  $\epsilon_{mw}$ , the interaction strength of the water-monomer attractions. For  $\epsilon=0.35$  kcal/mol, the intermonomer dispersive interactions equals the water-monomer attractions.
